# Supplementary material for: High-concentration organic dye removal using Fe2O3·3.9MoO3nanowires as Fenton-like catalysts
Source: Royal Society of Chemistry journal article supplement (doi:10.1039/c8en00346g), 2018-01-01
Supplement: c8en00346g1.pdf [file c8en00346g1.pdf]

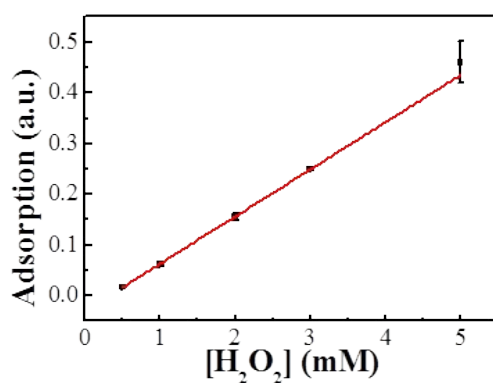

Figure S1. The calibration curve of pertitanic acid.

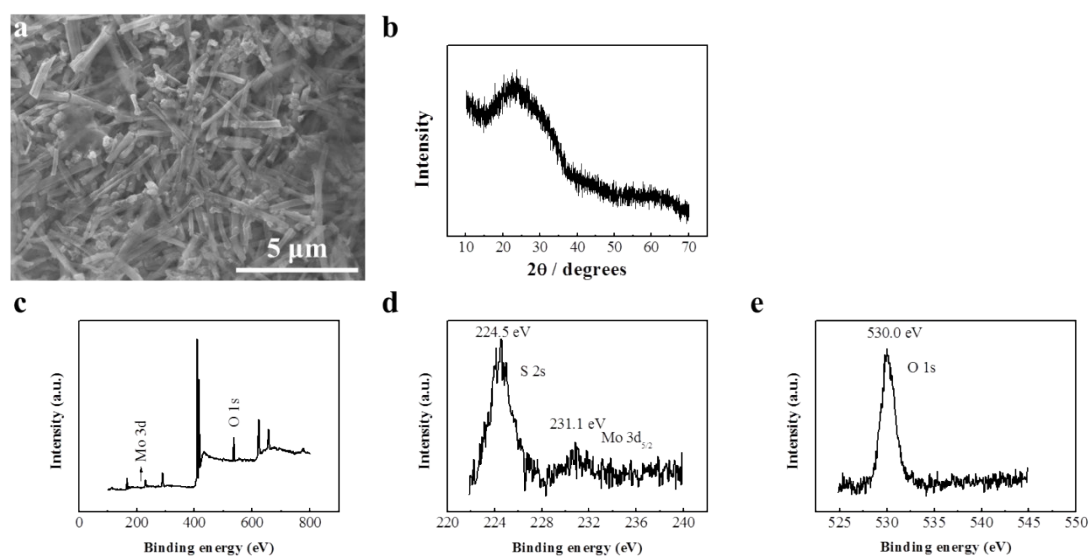

Figure S2 The SEM image (a), XRD pattern (b), XPS spectra (c-e) of  $\text{Fe}_2\text{O}_3 \cdot 3.9\text{MoO}_3$  nanowires after reused 5 cycles: (d) S 2s and Mo 3d, and (e) O 1s.
